# Supplementary material for: Synthesis of unsymmetrical 5,6-POCOP′-type pincer complexes of nickel(ii): impact of nickelacycle size on structures and spectroscopic properties
Source: Royal Society of Chemistry journal article supplement (doi:10.1039/c5nj00807g), 2015-01-01

## Supporting Information For:

### Synthesis of Unsymmetrical 5,6-POCOP'-Type Pincer Complexes of Nickel (II):

#### Impact of Nickelacycle Size on Structures and Spectroscopic Properties

Abderrahmen Salah, Martin Corpet, Najm ul-Hassan Khan, Davit Zargarian,\* and Denis Spasyuk†

\* Département de chimie, Université de Montréal, Montréal (Québec), Canada H3C 3J7

† Current address: Department of Chemistry, University of Calgary,

2500 University Dr. NW, Calgary, Alberta, Canada, T2N1N4

### Table of Contents

|                                                                                             |        |
|---------------------------------------------------------------------------------------------|--------|
| 1- Table1. <sup>1</sup> H NMR chemical shifts for all complexes.....                        | S2     |
| 2- Table2. <sup>13</sup> C NMR chemical shifts for aliphatic carbons for all complexes..... | S2     |
| 3- Table3. <sup>13</sup> C NMR chemical shifts for aromatic carbons for all complexes.....  | S3     |
| 4- Table4. <sup>31</sup> P{ <sup>1</sup> H}NMR Chemical shifts for all complexes.....       | S3     |
| 5- Table5. Crystal Data Collection and Refinement Parameters for Complexes 1-6.....         | S4     |
| 6- Table 6. Selected Bond Distances (Å) and Angles (deg) for Complexes 1-6.....             | S5     |
| 7- Spectra for incompletely characterized complexes.....                                    | S7-S11 |



**Table 1. <sup>1</sup>H NMR chemical shifts for all complexes**

| Comp.     | 2xCH <sub>3</sub><br>(dd)<br>( <sup>3</sup> J <sub>HH</sub><br><sup>3</sup> J <sub>HP</sub> ) | 2xCH <sub>3</sub><br>(dd)<br>( <sup>3</sup> J <sub>HH</sub> <sup>3</sup> J <sub>HP</sub> ) | 2xCH <sub>3</sub><br>(dd)<br>( <sup>3</sup> J <sub>HH</sub> <sup>3</sup> J <sub>HP</sub> ) | 2xCH <sub>3</sub><br>(dd)<br>( <sup>3</sup> J <sub>HH</sub> <sup>3</sup> J <sub>HP</sub> ) | 2xCH<br>(m) | 2xCH<br>(m) | OCH <sub>2</sub> Ar<br>(d)<br>( <sup>3</sup> J <sub>HP</sub> ) | ArH <sup>3</sup><br>(d)<br>( <sup>3</sup> J <sub>HH</sub> ) | ArH <sup>4</sup><br>(t)<br>( <sup>3</sup> J <sub>HH</sub><br><sup>4</sup> J <sub>HH</sub> ) | ArH <sup>5</sup><br>(d)<br>( <sup>3</sup> J <sub>HH</sub><br><sup>4</sup> J <sub>HH</sub> ) |
|-----------|-----------------------------------------------------------------------------------------------|--------------------------------------------------------------------------------------------|--------------------------------------------------------------------------------------------|--------------------------------------------------------------------------------------------|-------------|-------------|----------------------------------------------------------------|-------------------------------------------------------------|---------------------------------------------------------------------------------------------|---------------------------------------------------------------------------------------------|
| ligand    | 0.91<br>(7, 2)                                                                                | 1.00<br>(7, 2)                                                                             | 1.10<br>(7, 2)                                                                             | 1.14<br>(7, 2)                                                                             | 1.76 (m)    |             | 4.72<br>(8)                                                    | 6.82<br>(6)                                                 | 6.90<br>(m)                                                                                 |                                                                                             |
| <b>1</b>  | 1.09<br>(7, 13)                                                                               | 1.16<br>(7, 14)                                                                            | 1.42<br>(7, 2)                                                                             | 1.46<br>(7, 2)                                                                             | 2.42 (m)    |             | 4.60<br>(17)                                                   | 6.43<br>(6)                                                 | 6.88<br>(m)                                                                                 |                                                                                             |
| <b>2</b>  | 0.96 (7,<br>13)                                                                               | 1.21 (7,<br>12)                                                                            | 1.37 (7, 17)                                                                               | 1.74 (7, 19)                                                                               | 2.02<br>(m) | 2.90<br>(m) | 4.54 (17)                                                      | 6.35 (8)                                                    | 6.74 (m)                                                                                    |                                                                                             |
| <b>3</b>  | 0.92 (7,<br>13)                                                                               | 1.05 (7,<br>12)                                                                            | 1.36 (7, 18)                                                                               | 1.55 (7, 19)                                                                               | 2.09<br>(m) | 2.58<br>(m) | 4.44 (17)                                                      | 6.28 (7)                                                    | 6.61 (7)                                                                                    | 6.70 (7,<br>1)                                                                              |
| <b>4b</b> | 1.11 (7,<br>14)                                                                               | 1.30 (7,<br>14)                                                                            | 1.38 (7, 6)                                                                                | 1.43 (vt, 7)                                                                               | 1.97<br>(m) | 2.30<br>(m) | 4.89 (17)                                                      | 6.79 (7)                                                    | 6.87 (7)                                                                                    | 7.02 (7)                                                                                    |
| <b>5</b>  | 1.21 (m)                                                                                      |                                                                                            | 1.40 (7, 16)                                                                               | 1.48 (7, 16)                                                                               | 2.43 (m)    |             | 4.75 (15)                                                      | 6.53 (7)                                                    | 6.97 (7)                                                                                    | 7.07 (8)                                                                                    |
| <b>6</b>  | 1.11 (7,<br>13)                                                                               | 1.16 (7,<br>19)                                                                            | 1.20 (7, 18)                                                                               | 1.25 (7, 19)                                                                               | 2.15 (m)    |             | 4.76 (16)                                                      | 6.59 (8)                                                    | 7.00 (7,<br>2)                                                                              | 8 (7)                                                                                       |

**Table 2. <sup>13</sup>C NMR chemical shifts for aliphatic carbons all complexes**

| Comp.     | 2xCH <sub>3</sub><br>(s) | 2xCH <sub>3</sub><br>(s) | 2xCH <sub>3</sub><br>(d)<br>( <sup>3</sup> J <sub>CP</sub> ) | 2xCH <sub>3</sub><br>(d)<br>( <sup>3</sup> J <sub>CP</sub> ) | 1xCH<br>(d)<br>( <sup>1</sup> J <sub>CP</sub> ) | CH <sub>2</sub><br>(s) |
|-----------|--------------------------|--------------------------|--------------------------------------------------------------|--------------------------------------------------------------|-------------------------------------------------|-------------------------------------------------|-------------------------------------------------|-------------------------------------------------|------------------------|
| ligand    | 17.81<br>(20)            | 17.53<br>(20)            | 16.92<br>(20)                                                | 16.82<br>(20)                                                | 28.13 (24) dd                                   |                                                 | 28.31 (24) dd                                   |                                                 | 74.03                  |
| <b>1</b>  | 17.10 d (15)             |                          | 18.34<br>(4)                                                 | 19.15<br>(5)                                                 | 28.06<br>(24, 3)                                |                                                 | 28.47<br>(20, 3)                                |                                                 | 76.10                  |
| <b>2</b>  | 16.69                    | 17.30                    | 18.15<br>(6)                                                 | 19.83<br>(7)                                                 | 27.08<br>(21)                                   |                                                 | 29.75<br>(16)                                   |                                                 | 76.99                  |
| <b>3</b>  | 16.29                    | 16.69                    | 17.63<br>s                                                   | 17.69<br>s                                                   | 27.28<br>s                                      |                                                 | 28.47<br>br                                     |                                                 | 76.53<br>br            |
| <b>4b</b> | 17.54                    | 18.39                    | 19.06<br>(7)                                                 | 20.68<br>(8)                                                 | 27.93 (23)                                      |                                                 | 30.60 (18, 3)                                   |                                                 | 77.48                  |
| <b>5</b>  | 14.47                    | 15.49 d<br>(5)           | 16.68 (5)                                                    |                                                              | 25.68 (22)                                      |                                                 | 26.67 (26)                                      |                                                 | 72.59                  |
| <b>6</b>  | 16.87                    | 17.01                    | 17.78                                                        | 18.83                                                        | 27.44 dd (12,<br>3)                             |                                                 | 27.65 dd (12,<br>3)                             |                                                 | 75.12                  |

**Table 3.**  $^{13}\text{C}$  NMR chemical shifts for Aromatic ring for all complexes

| Comp.     | ArC <sup>1</sup><br>(dd)<br>( $^2J_{\text{CP}}$ ) | ArC <sup>2</sup><br>(dd)<br>( $^2J_{\text{CP}}$ $^3J_{\text{CP}}$ ) | ArC <sup>3</sup><br>(d)<br>( $^3J_{\text{CP}}$ ) | ArC <sup>4</sup><br>(s) | ArC <sup>5</sup><br>(s) | ArC <sup>6</sup><br>(dd)<br>( $^3J_{\text{CP}}$ ) |
|-----------|---------------------------------------------------|---------------------------------------------------------------------|--------------------------------------------------|-------------------------|-------------------------|---------------------------------------------------|
| ligand    | 159.70 (9)                                        | 120.52 (2)                                                          | 141.45 (8)                                       | 114.66 (6)              | 129.30                  | 141.45 (8)                                        |
| <b>1</b>  | 132.03<br>(42)                                    | 170.07<br>(17, 2)                                                   | 111.63<br>(13)                                   | 127.17                  | 120.89                  | 142.15<br>(12)                                    |
| <b>2</b>  | 142.11                                            | 170.24 (15)                                                         | 111.93 (11)                                      | 127.46                  | 121.30                  | 142.63<br>(12)                                    |
| <b>3</b>  | 136.47 (42)                                       | 169.65 (17, 2)                                                      | 112.00<br>(13)                                   | 128.80                  | 121.39                  | 141.51<br>(12)                                    |
| <b>4b</b> | 133.96 (29)                                       | 169.39 (17)                                                         | 112.78 (10)                                      | 128.31                  | 122.15                  | 143.49<br>(14)                                    |
| <b>5</b>  | 136.21 (19)                                       | 167.71 (18)                                                         | 108.15<br>(13)                                   | 124.10                  | 117.61                  | 139.74<br>(12)                                    |
| <b>6</b>  | 142.40 pst.<br>(20.4)                             | 169.20 (18, 6)                                                      | 110.47<br>(13)                                   | 125.74                  | 119.56                  | 143.05<br>(10)                                    |

**Table 4.**  $^{31}\text{P}\{^1\text{H}\}$  NMR chemical shifts for all complexes

| Compound  | $\delta$ for ArO- <i>P</i><br>(multiplicity, $^2J_{\text{pp}}$ in Hz) | $\delta$ for ArCH <sub>2</sub> O- <i>P</i><br>(multiplicity, $^2J_{\text{pp}}$ in Hz) |
|-----------|-----------------------------------------------------------------------|---------------------------------------------------------------------------------------|
| POCHOP'   | 154 (s)                                                               | 147 (s)                                                                               |
| <b>1</b>  | 187 (d, 283)                                                          | 155 (d, 283)                                                                          |
| <b>2</b>  | 189 (d, 302)                                                          | 148 (d, 302)                                                                          |
| <b>3</b>  | 189 (d, 285)                                                          | 148 (d, 285)                                                                          |
| <b>4b</b> | 194 (d, 260)                                                          | 152 (d, 260)                                                                          |
| <b>5</b>  | 187 (d, 323)                                                          | 160 (d, 323)                                                                          |
| <b>6</b>  | 187 (d, 323)                                                          | 160 (d, 323)                                                                          |

**Table 5. Crystal Data Collection and Refinement Parameters for Complexes 1-6.**

|                              | <b>1</b>                                                                         | <b>2</b>                                                                        | <b>4b</b>                                                                                      | <b>5</b>                                                         | <b>6</b>                                                         |
|------------------------------|----------------------------------------------------------------------------------|---------------------------------------------------------------------------------|------------------------------------------------------------------------------------------------|------------------------------------------------------------------|------------------------------------------------------------------|
| Chem. Formula                | C <sub>19</sub> H <sub>33</sub> O <sub>2</sub> P <sub>2</sub> Br <sub>1</sub> Ni | C <sub>26</sub> H <sub>40</sub> O <sub>5</sub> P <sub>2</sub> S <sub>1</sub> Ni | C <sub>57</sub> H <sub>56</sub> O <sub>2</sub> P <sub>2</sub> N <sub>1</sub> B <sub>1</sub> Ni | C <sub>22</sub> H <sub>36</sub> O <sub>2</sub> P <sub>2</sub> Ni | C <sub>20</sub> H <sub>36</sub> O <sub>2</sub> P <sub>2</sub> Ni |
| Cryst. colour                | yellow                                                                           | yellow                                                                          | yellow                                                                                         | yellow                                                           | yellow                                                           |
| Fw                           | 494.01                                                                           | 585.29                                                                          | 833.05                                                                                         | 450.15                                                           | 429.14                                                           |
| T (K)                        | 150                                                                              | 150                                                                             | 150                                                                                            | 150                                                              | 150                                                              |
| λ (Å)                        | 1.54178                                                                          | 1.54178                                                                         | 1.54178                                                                                        | 1.54178                                                          | 1.54178                                                          |
| Space Group                  | P-1                                                                              | P21/c                                                                           | Pbca                                                                                           | P-1                                                              | P-1                                                              |
| A (Å)                        | 8.3325(2)                                                                        | 8.4032(3)                                                                       | 19.7665(4)                                                                                     | 8.0421(7)                                                        | 8.3833(2)                                                        |
| B (Å)                        | 10.9016(2)                                                                       | 16.9796(7)                                                                      | 17.7155(4)                                                                                     | 16.7084(15)                                                      | 10.8596(2)                                                       |
| C(Å)                         | 12.7875(3)                                                                       | 21.3710(8)                                                                      | 23.8071(6)                                                                                     | 17.4737(16)                                                      | 12.7379(3)                                                       |
| α (deg)                      | 102.314(1)                                                                       | 90                                                                              | 90                                                                                             | 90.814(4)                                                        | 102.681(1)                                                       |
| β (deg)                      | 94.699(1)                                                                        | 105.376(2)                                                                      | 90                                                                                             | 90.648(4)                                                        | 94.204(1)                                                        |
| γ (deg)                      | 91.958(1)                                                                        | 90                                                                              | 90                                                                                             | 97.959(4)                                                        | 92.443(1)                                                        |
| Z                            | 2                                                                                | 4                                                                               | 4                                                                                              | 2                                                                | 2                                                                |
| V(Å <sup>3</sup> )           | 1129.45(4)                                                                       | 2940.1(2)                                                                       | 8336.6(3)                                                                                      | 2324.9(4)                                                        | 1126.26(4)                                                       |
| ρ <sub>calcd</sub>           | 1.453                                                                            | 1.322                                                                           | 1.327                                                                                          | 1.295                                                            | 1.265                                                            |
| μ (cm <sup>-1</sup> )        | 47.20                                                                            | 29.08                                                                           | 17.14                                                                                          | 26.03                                                            | 26.55                                                            |
| θ range (deg)                | 4.16-67.42                                                                       | 3.37-67.95                                                                      | 3.71-67.92                                                                                     | 2.53-68.00                                                       | 3.57-67.96                                                       |
| R1 <sup>a</sup> [I>2σ]       | 0.0320                                                                           | 0.0300                                                                          | 0.0371                                                                                         | 0.0506                                                           | 0.0407                                                           |
| wR2 <sup>b</sup> [I > 2σ(I)] | 0.0853                                                                           | 0.0836                                                                          | 0.0979                                                                                         | 0.1318                                                           | 0.1124                                                           |
| R1[all data]                 | 0.0340                                                                           | 0.0318                                                                          | 0.0380                                                                                         | 0.0527                                                           | 0.0412                                                           |
| WR2[all data]                | 0.0867                                                                           | 0.0846                                                                          | 0.0985                                                                                         | 0.1335                                                           | 0.1130                                                           |
| GOF                          | 1.048                                                                            | 1.048                                                                           | 1.104                                                                                          | 1.048                                                            | 1.029                                                            |

$$^a R_1 = \frac{\sum(|F_o| - |F_c|)}{\sum|F_o|}$$

$$^b wR_2 = \left\{ \frac{\sum[w(F_o^2 - F_c^2)^2]}{\sum[w(F_o^2)]} \right\}^{1/2}$$

**Table 6. Selected Bond Distances (Å) and Angles (deg) for Complexes 1-6.**

|                                     | <b>1</b>  | <b>2</b>  | <b>4b</b> | <b>5<sup>†</sup></b> | <b>6</b>  |
|-------------------------------------|-----------|-----------|-----------|----------------------|-----------|
| Ni-C(1)                             | 1.920(2)  | 1.916(2)  | 1.919(2)  | 1.936(3)             | 1.947(2)  |
| Ni-P(1)                             | 2.1443(7) | 2.1684(5) | 2.1559(5) | 2.1267(8)            | 2.1177(6) |
| Ni-P(2)                             | 2.1744(7) | 2.1924(5) | 2.1921(5) | 2.1283(8)            | 2.1355(5) |
| Ni-X/L                              | 2.3372(4) | 1.937(1)  | 1.881(1)  | 1.9100(3)            | 2.065(2)  |
| P(1)-Ni-P(2)                        | 169.26(3) | 169.19(2) | 169.30(2) | 170.26(4)            | 168.14(3) |
| P(1)-Ni-X                           | 91.15(2)  | 94.39(4)  | 93.71(5)  | 92.24(9)             | 92.19(5)  |
| P(2)-Ni-X                           | 92.24(2)  | 88.55(4)  | 92.82(5)  | 91.28(9)             | 91.89(5)  |
| P(1)-Ni-C(1)                        | 83.39(6)  | 83.95(5)  | 81.56(5)  | 85.39(10)            | 83.03(6)  |
| P(2)-Ni-C(1)                        | 93.06(6)  | 92.92(5)  | 91.86(5)  | 93.76(10)            | 92.78(6)  |
| C(1)-Ni-X                           | 174.53(6) | 178.26(6) | 175.27(7) | 176.57(13)           | 175.22(8) |
| Twist angle <sup>‡</sup>            | 21        | 16        | 25        | 9                    | 22        |
| Tetrahedral distortion <sup>*</sup> | 0.197     | 0.280     | 0.000     | 0.124                | 0.213     |

<sup>†</sup>All the values cited for this complex represent averages of the corresponding values in two independent molecules.

<sup>‡</sup> Twist angle is defined as the angle between the (mean) planes encompassing the benzenic moiety of the 5,6-POCOP' ligand (C(1)-C(6)) and the atoms P(1), C(1), and P(2).

<sup>\*</sup> Distance of Ni from the plane defined by the atoms P(1), C(1), and P(2).

**Complex 3 :  $^{13}\text{C}\{^1\text{H}\}$  NMR (101 MHz,  $\text{C}_6\text{D}_6$ )**

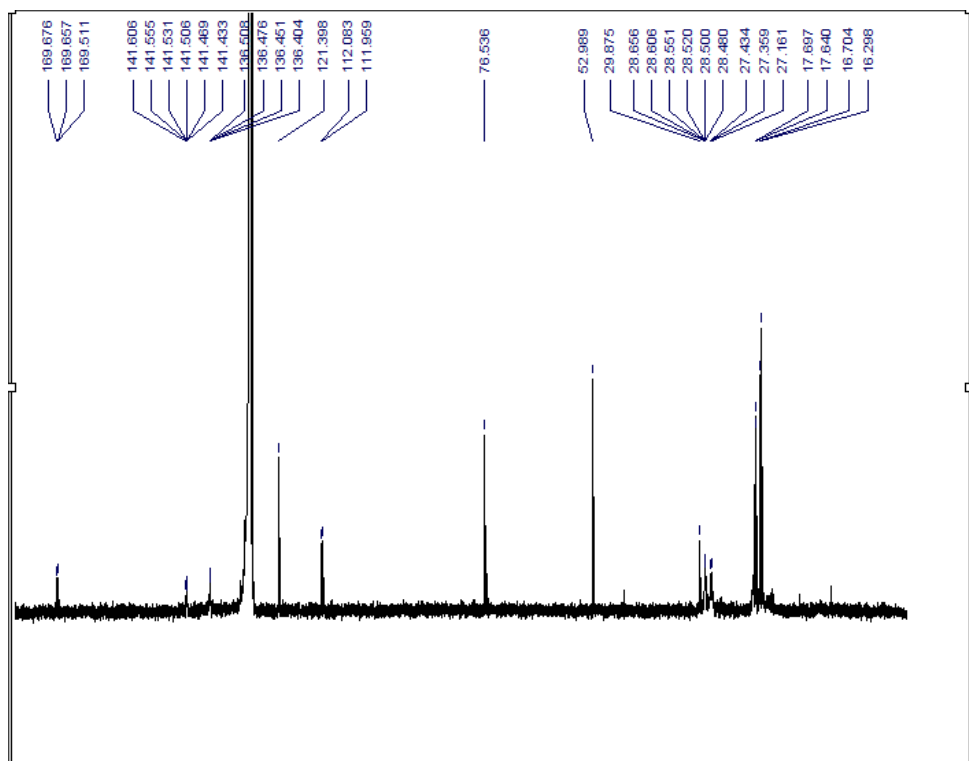

**Complex 3 :  $^{31}\text{P}\{^1\text{H}\}$  NMR (162 MHz,  $\text{C}_6\text{D}_6$ )**

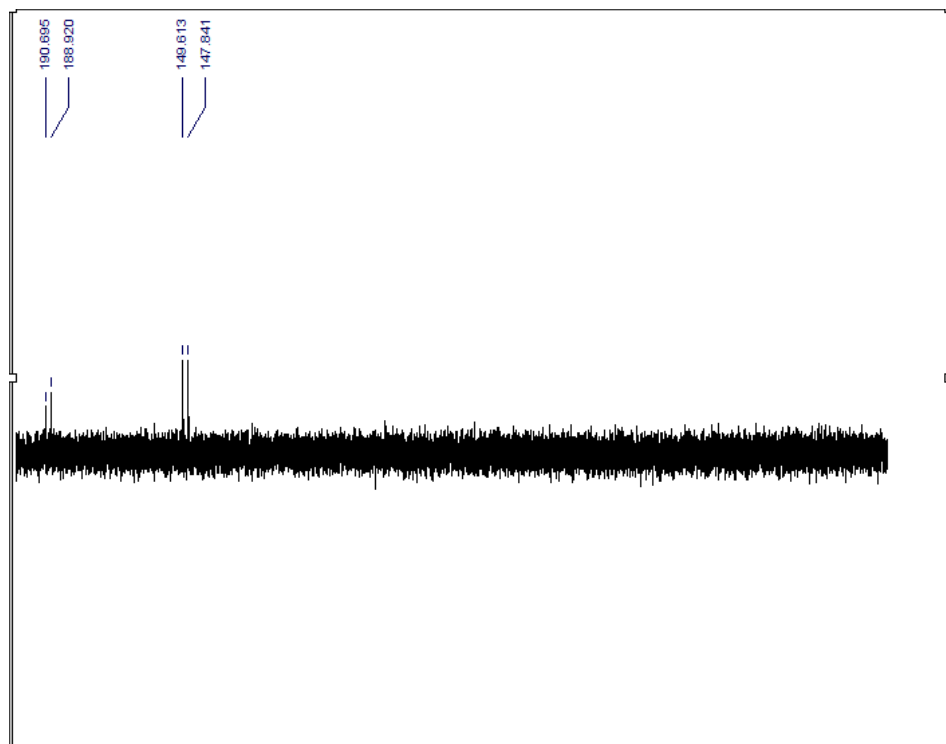

**Complex 5:  $^1\text{H}$  NMR (400 MHz,  $\text{C}_6\text{D}_6$ )**

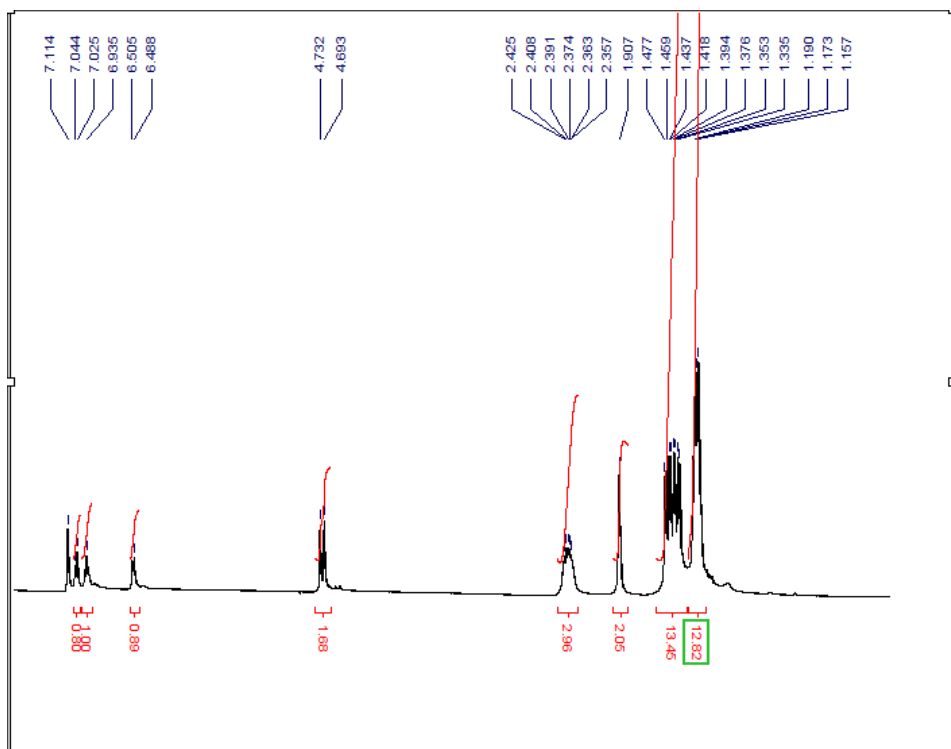

**Complex 5:  $^{13}\text{C}\{^1\text{H}\}$  NMR (101 MHz,  $\text{C}_6\text{D}_6$ )**

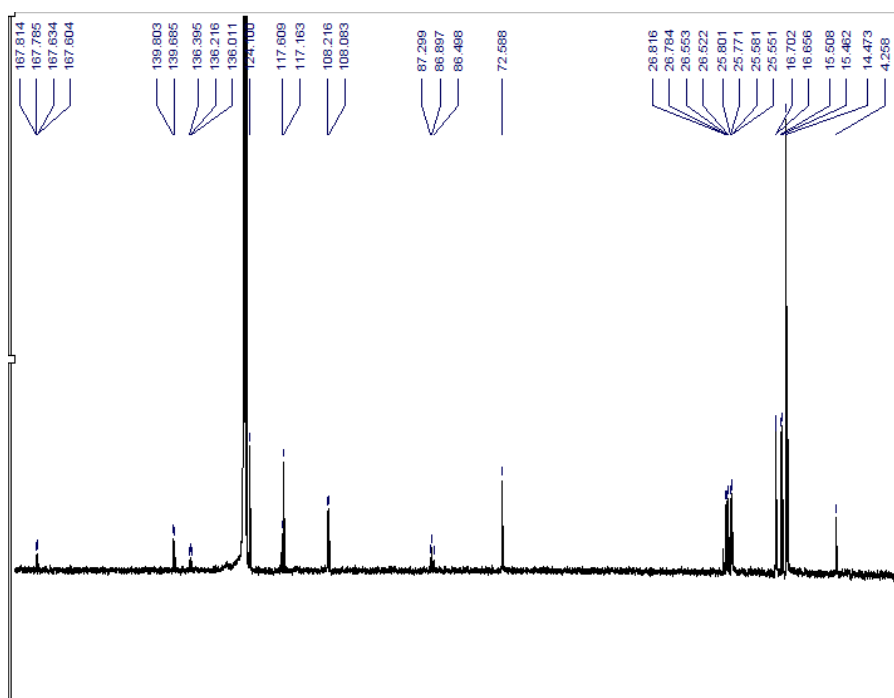



**Complex 5:**  $^{31}\text{P}\{^1\text{H}\}$  NMR (162 MHz,  $\text{C}_6\text{D}_6$ )

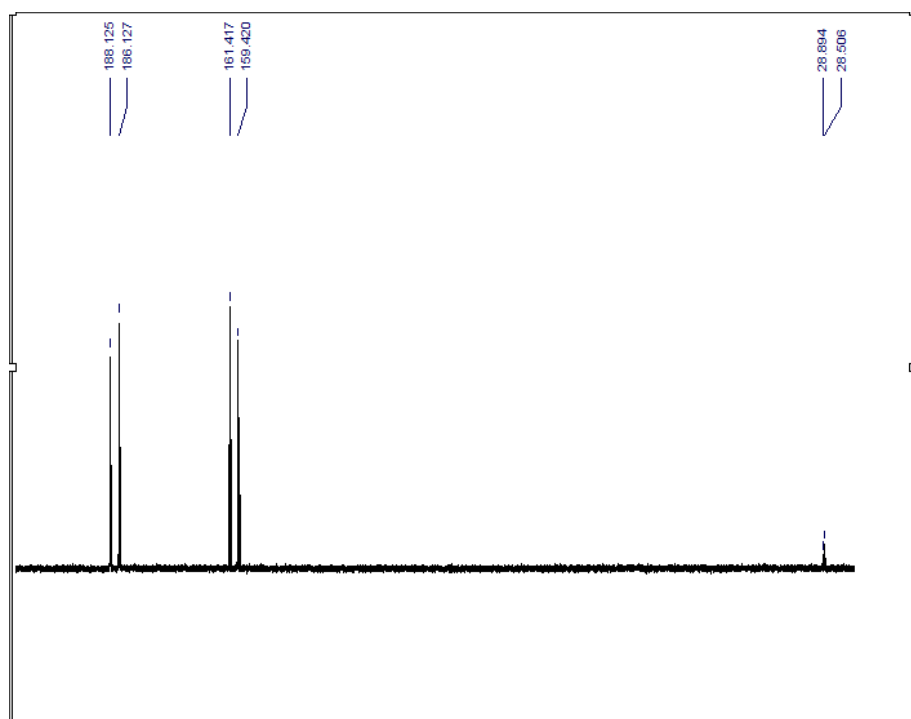

**Complex 6:** aliphatic region of  $^1\text{H}$  NMR (400 MHz,  $\text{C}_6\text{D}_6$ )

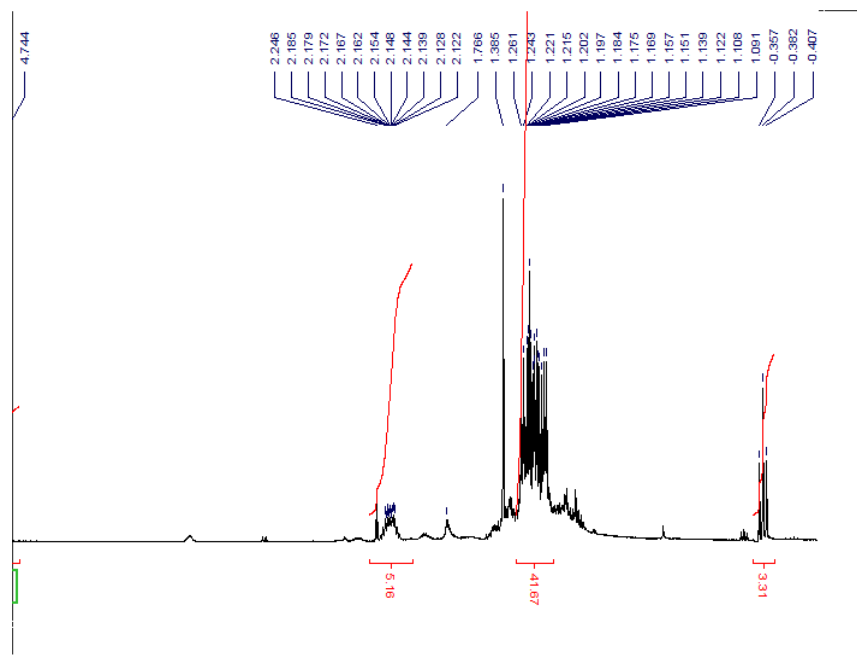

**Complex 6:** vinylic/aromatic region of  $^1\text{H}$  NMR (400 MHz,  $\text{C}_6\text{D}_6$ )

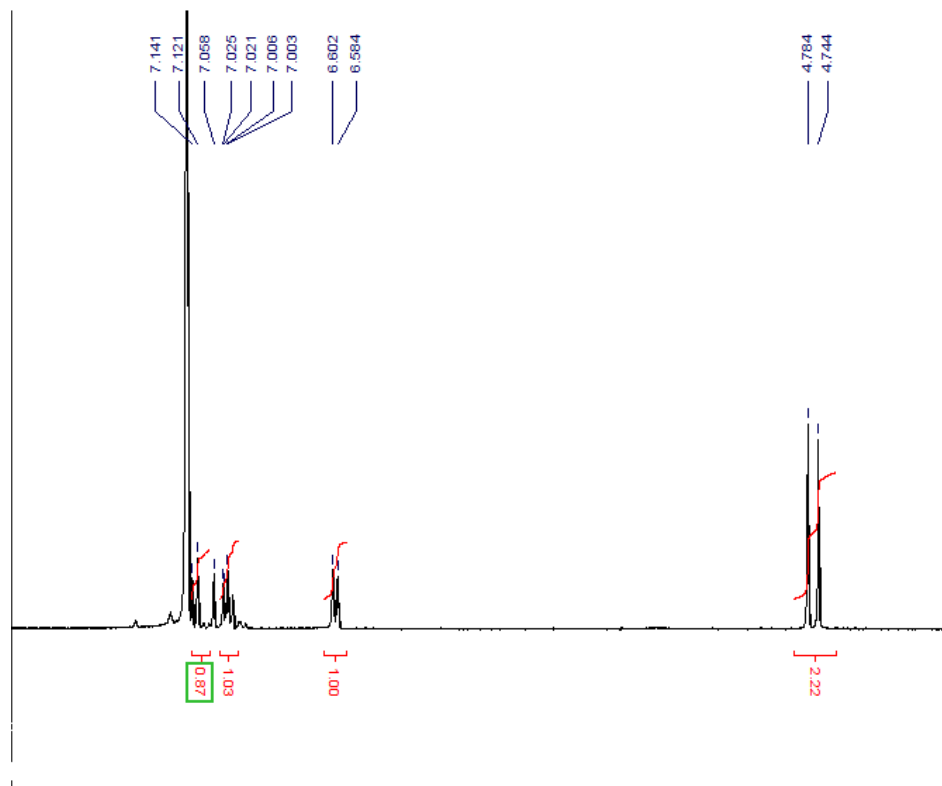

**Complex 6:**  $^{13}\text{C}\{^1\text{H}\}$  NMR (101 MHz,  $\text{C}_6\text{D}_6$ )

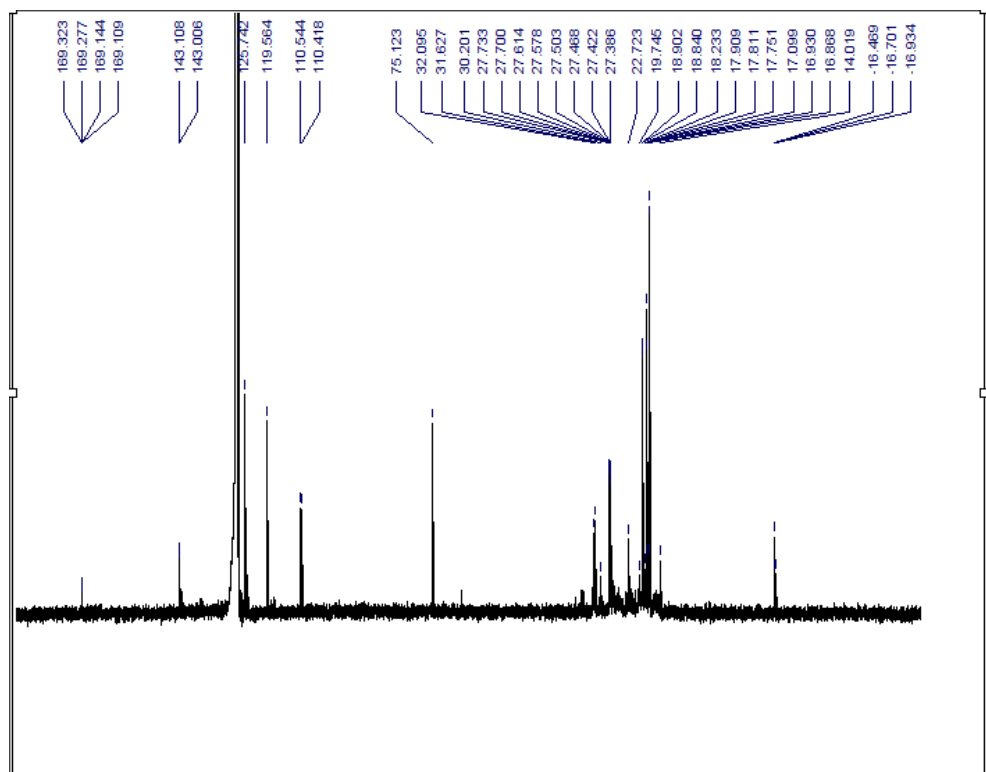

**Complex 6:**  $^{31}\text{P}\{^1\text{H}\}$  NMR (162 MHz,  $\text{C}_6\text{D}_6$ )

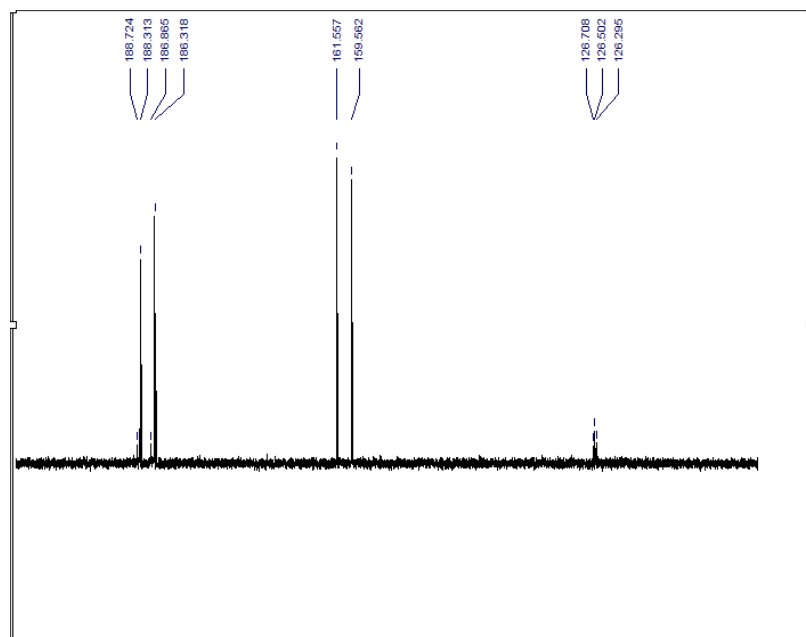

Supplement: c5nj00807g1.pdf [file c5nj00807g1.pdf]
